# Supplementary material for: New routes to mesoporous silica-based spheres with functionalised surfaces
Source: Royal Society of Chemistry journal article supplement (doi:10.1039/b418191c), 2005-01-01
Supplement: b418191c.doc [file b418191c.doc]

Electronic Supplementary Information :

1. Determination of the volumic percentage of highly ordered domains by TEM

Sample **1** contains highly ordered 2D hexagonal domains that result in the *p*6*mm* diffraction peaks and more disordered domains located at the centre of the spheres, still phase-separated at the nanometer scale, and that contribute to a broader scattering peak under the diffraction peaks. Because the volumic fraction of the ordered domains can be overestimated from the single analysis of one sphere hazardously cutted by ultramicrotome, we analysed 21 uncalcined cutted spheres. For each resulting disk, we measured the diameters of the whole disk (*D*) and of the disordered domain (*Ddis*). The quantity (*D*3 - *Ddis*3)/*D*3 is proportional to an apparent volumic fraction of highly ordered domains. Its variation as a function of *D* is shown below. All the values are equal or above 0.6. Moreover, the diameters measured on TEM micrographs are in the range of the diameters measured by SEM (*DGM* = 1.4 m). Therefore, we can estimate the volumic percentage of ordered domains to at least 60 %.

*D* (m)

(*D*3 - *Ddis*3*)*/*D*3

*DGM* = 1.4 m

from SEM

60 %

*Highly ordered domains*

*D*

*Ddis*

Electronic Supplementary Information :

2. Quantification and spatial localisation of Si-Me groups by solid state NMR

The 1H one-dimensional spectrum of sample **1** recorded at high magnetic field (750 MHz) and fast MAS (30 kHz) is shown with its assignment. Deconvolution of this spectrum by a proper software[[1]](#footnote-2) allows the quantification of each organic function. Considering a fixed molar ratio [CTAB]/[*Q* units]=0.12 (in accordance with elemental analysis on various mesoporous samples), the molar ratios [*T* units]/[*Q* units] and [Si-OR’ + Si-Me]/[Si] can be calculated. The values found for [*T* units]/[*Q* units] are close to those found by 29Si NMR single pulse experiments.

The 1H-1H two dimensional spectrum of sample **1** shown below represents a BaBa Double Quantum ↔ Single Quantum experiment.[[2]](#footnote-3) It allows identifying the pairs of spatially closed 1H nuclei coupled by dipolar interactions. The spectrum has been recorded at high magnetic field (750 MHz) and fast MAS (30 kHz) using excitation and reconversion delays of 100 s. RF field strengths of c.a. 50 kHz were employed. From the off-diagonal peaks, we can observe a correlation between signals of Si-C**H**3 and N-(C**H**3)+ that signs the spatial proximity between these groups, and thus the presence of Si-Me at the siloxane-surfactant interface.

MAS Single Quantum dimension

Other X**H**x ↔ Si-C**H**3

N-(C**H**3)+ ↔ Si-C**H**3

N-(C**H**3)+ ↔ Other X**H**x

C**H**(CH3)2 ↔ CH(C**H**3)2

(1H) (ppm)

0

2

4

6

8

Si-OC**H**(CH3)2

Si-OC**H**2CH3

Si-C**H**3

(CH2)15-C**H**3

CH2N(C**H**3)3+

C**H**2N(CH3)3+

Other X**H**x

Double Quantum dimension

Off-diagonal peaks:

Si-O**H**

1. D. Massiot, F. Fayon, M. Capron, I. King, S. Le Calvé, B. Alonso, J.-O. Durand, B. Bujoli, Z. Gan and G. Hoatson, *Magn. Reson. Chem*., 2002, **40**, 70-76. [↑](#footnote-ref-2)
2. W. Sommer, J. Gottwald, D. E. Demco and H. W. Spiess, *J. Magn. Reson. A*, 1995, **113**, 131-134. [↑](#footnote-ref-3)
